# Supplementary material for: Serum protein changes in a rat model of chronic pain show a correlation between animal and humans
Source: PubMed Central journal article supplement (PMC5286399; doi:10.1038/srep41723), 2017-02-01
Supplement: srep41723-s1.pdf [file srep41723-s1.pdf]

## Supplementary Information

Manuscript Title: Serum protein changes in a rat model of chronic pain show a correlation between animal and humans.

Author list: Elisa Bellei, Antonietta Vilella, Emanuela Monari, Stefania Bergamini, Aldo Tomasi<sup>1</sup>, Aurora Cuoghi, Simona Guerzoni, Letizia Manca, Michele Zoli, Luigi Alberto Pini

### Supplementary figure 1

Allodynia in sham-operated rats and CCI rats 2 or 5 weeks after surgery evaluated by means of the Von Frey test. All CCI rats showed signs of allodynia at both 2 and 5 weeks post-surgery.

Statistical analysis according to two-way ANOVA.

2 weeks: CCI/sham,  $F(1,35) = 4.377$ ,  $p=0.044$ ; saline/indomethacin,  $F(1,35) = 1.342$ ,  $p=0.255$ ; interaction,  $F(1,35) = 1.464$ ,  $p=0.234$ .

5 weeks: CCI/sham,  $F(1,30) = 10.096$ ,  $p=0.003$ ; saline/indomethacin,  $F(1,35) = 1.400$ ,  $p=0.246$ ; interaction,  $F(1,35) = 2.213$ ,  $p=0.147$ .

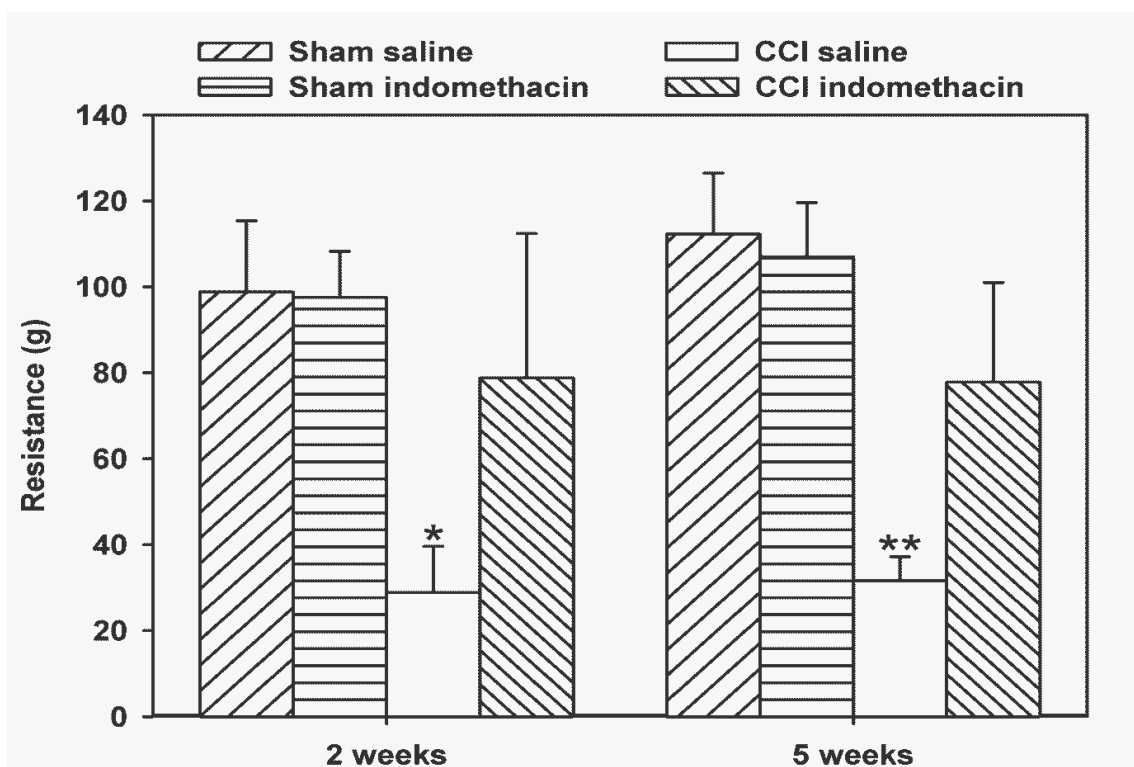

## Supplementary figure 2

Levels of APOE and PTGDS mRNA in the striatum of rats 5 weeks after sham-operation or a CCI of the sciatic nerve.

The data were analysed by means of two-way ANOVA with sham-operation/ligation and saline/indomethacin as factors, showing no significant effect.

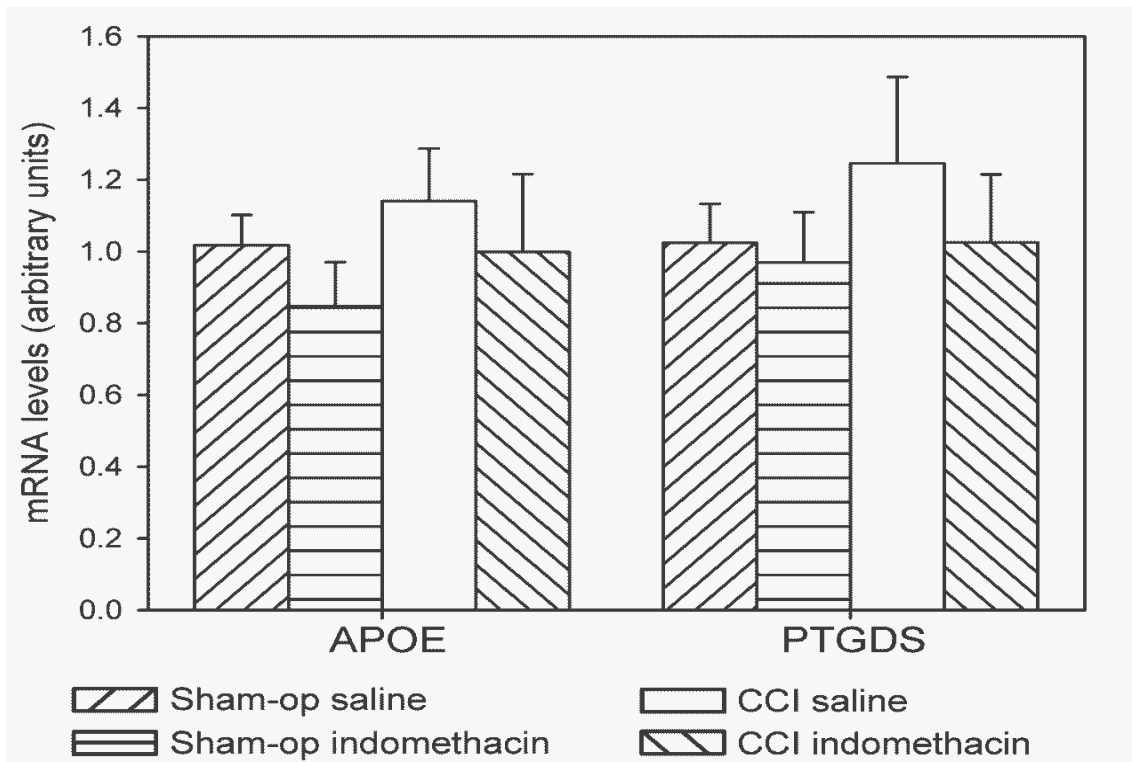

## **Supplementary method**

**Von Frey hair test.** Mechanical sensitivity (allodynia) was assessed by Von Frey hair test, based on the responsiveness of the operated hind paw to the application of a series of von Frey filaments (Aesthesio®, USA), progressively increasing the stiffness (ranging from 0.008 to 300 g). Animals were placed in a plexiglass cage with a metal grid floor, allowing them to move freely. Filaments were applied to the mid-plantar surface of both the operated and non-injured hindpaw. The smallest filament that elicited a foot withdrawal response was considered the threshold stimulus. Withdrawal thresholds at the contralateral (non-injured) side remained constant throughout the experiments.
